# Supplementary material for: Efficient Differentiation of TBX18+/WT1+ Epicardial-Like Cells from Human Pluripotent Stem Cells Using Small Molecular Compounds
Source: PubMed Central journal article supplement — Stem Cells Dev. 2017 Apr 1;26(7):528–40. doi: 10.1089/scd.2016.0208 (PMC5372775; doi:10.1089/scd.2016.0208), 2017-04-01
Supplement: Supp_Fig1.pdf [file Supp_Fig1.pdf]

## Supplementary Data

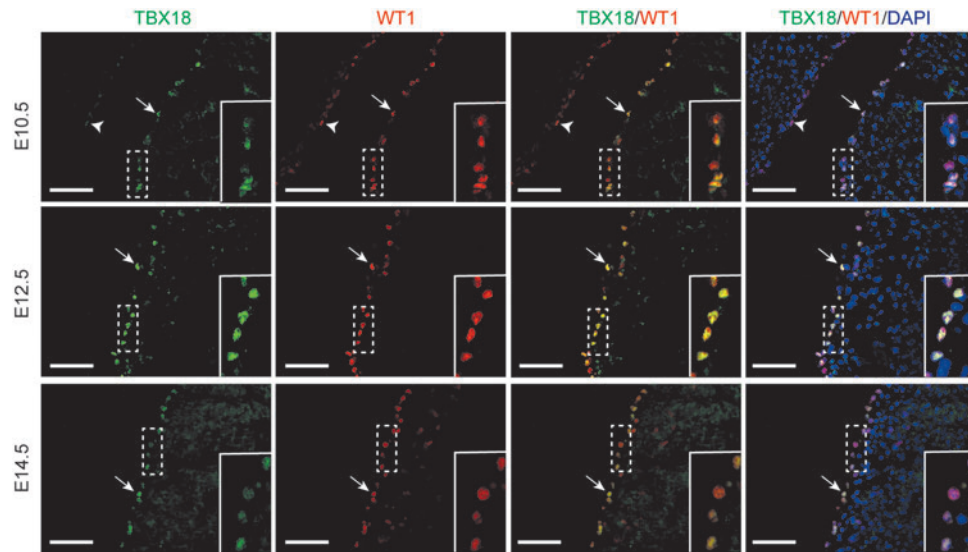

**SUPPLEMENTARY FIG. S1.** TBX18 and WT1 are coexpressed in the epicardium of the embryonic heart. The majority of epicardial cells (E10.5–E14.5) immunostained as double positive for TBX18 and WT1. *Yellow in the inset panels* shows TBX18 and WT1 coexpression. Note the TBX18-nonspecific background staining of the myocardium. *Arrows*, epicardium; *arrowheads*, pericardium; scale bars, 100  $\mu\text{m}$ .
