# Supplementary material for: Efficient Differentiation of TBX18+/WT1+ Epicardial-Like Cells from Human Pluripotent Stem Cells Using Small Molecular Compounds
Source: PubMed Central journal article supplement — Stem Cells Dev. 2017 Apr 1;26(7):528–40. doi: 10.1089/scd.2016.0208 (PMC5372775; doi:10.1089/scd.2016.0208), 2017-04-01
Supplement: Supp_Fig2.pdf [file Supp_Fig2.pdf]

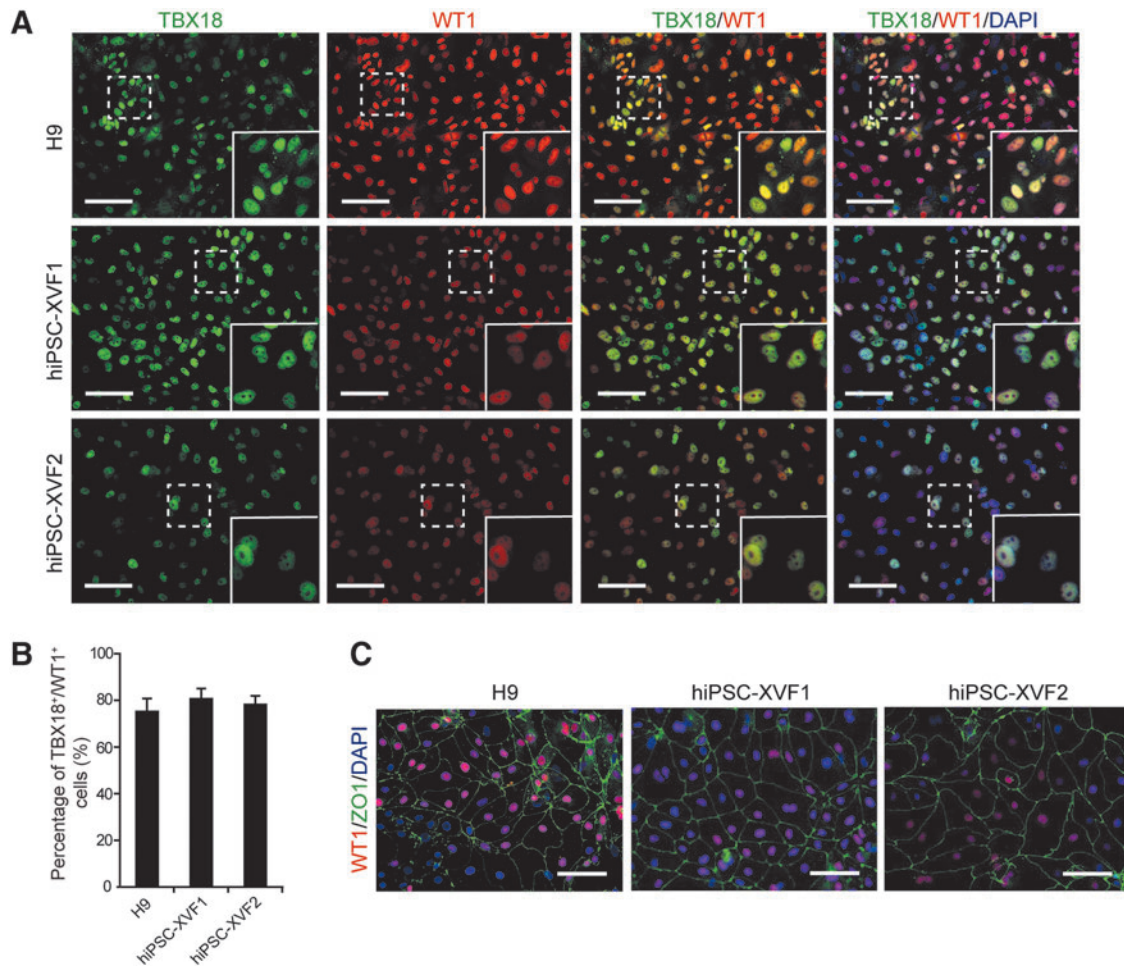

**SUPPLEMENTARY FIG. S2.** Generation of epicardial-like cells from H9 and hiPSC lines. **(A)** Immunofluorescence staining of TBX18 and WT1 in D14 H9- and hiPSC-derived proepicardial-like cells. Scale bars, 100  $\mu$ m. **(B)** High-content imaging assays of the proportion of TBX18<sup>+</sup>/WT1<sup>+</sup> cells in D14 H9- and hiPSC-derived proepicardial-like cell populations. Error bars represent standard error of mean (SEM);  $n=3$ . **(C)** Immunofluorescence staining for WT1 and ZO1 protein in D15+2 H9- and hiPSC-derived epicardial-like populations. Scale bars, 100  $\mu$ m. **(D)** Immunofluorescence staining of CNN1 and TAGLN in D15+8 TGF $\beta$ 1+bFGF-induced H9- and hiPSC-EPLC cultures. Scale bars, 100  $\mu$ m. **(E)** Immunofluorescence staining of POSTN in D15+8+6 bFGF+S-induced H9- and hiPSC-EPLC cultures. Scale bars, 100  $\mu$ m. **(F)** Flow cytometry analysis of the proportion of CNN1<sup>+</sup>/TAGLN<sup>+</sup> SMCs in D15+8 TGF $\beta$ 1+bFGF-induced H9- and hiPSC-EPLC cultures. Error bars represent SEM;  $n=3$ . **(G)** Flow cytometry analysis of the proportion of POSTN<sup>+</sup> CFs in D15+8+6 bFGF+S-induced H9- and hiPSC-EPLC cultures. Error bars represent SEM;  $n=3$ . bFGF, basic fibroblast growth factor; CFs, cardiac fibroblasts; EPLC, epithelial-like cell; hiPSC, human-induced pluripotent stem cell; SMCs, smooth muscle cells; TGF $\beta$ 1, transforming growth factor  $\beta$ 1.

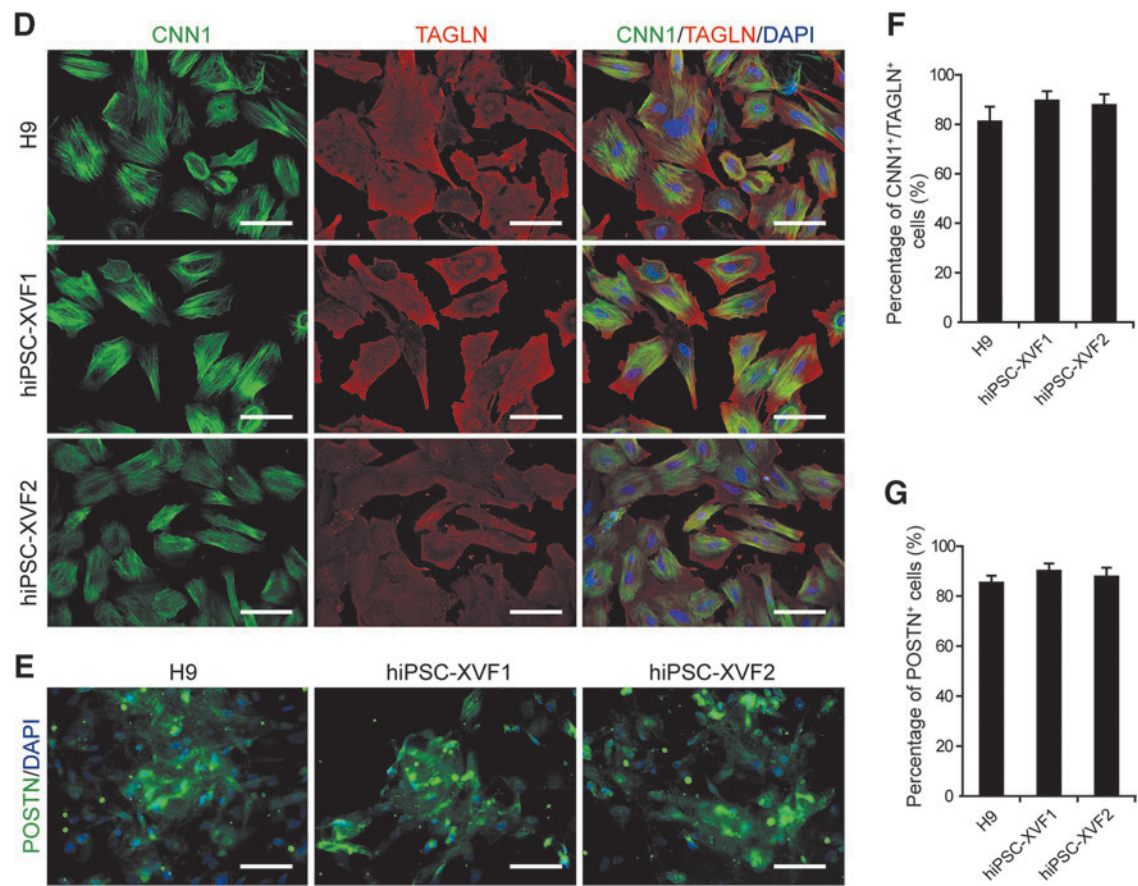

SUPPLEMENTARY FIG. S2. (Continued).
