# Supplementary material for: Efficient Differentiation of TBX18+/WT1+ Epicardial-Like Cells from Human Pluripotent Stem Cells Using Small Molecular Compounds
Source: PubMed Central journal article supplement — Stem Cells Dev. 2017 Apr 1;26(7):528–40. doi: 10.1089/scd.2016.0208 (PMC5372775; doi:10.1089/scd.2016.0208), 2017-04-01
Supplement: Supp_Table1.pdf [file Supp_Table1.pdf]

SUPPLEMENTARY TABLE S1. QUANTITATIVE REAL-TIME POLYMERASE CHAIN REACTION PRIMERS LIST

| <i>Gene</i> | <i>Forward primer</i>      | <i>Reverse primer</i>      |
|-------------|----------------------------|----------------------------|
| T           | CAGTGGCAGTCTCAGGTTAAGAAGGA | CGCTACTGCAGGTGTGAGCAA      |
| MESP1       | CACCGTCCCCGCTCCTTC         | CGGCGTCAGTTGTCCCTTGT       |
| ISL1        | TTGTACGGGATCAAATGCGCCAAG   | AGGCCACACAGCGGAAACA        |
| NKX2.5      | ACCTCAACAGTCCCTGACTCT      | ATAATCGCCGCCACAAACTCTCC    |
| TBX18       | TTAACCTTGTCCGTCTGCCTGAGT   | GTAATGGGCTTTGGCCTTTGCACT   |
| WT1         | ATAGGCCAGGGCATGTGTATGTGT   | AGTTGCCTGGCAGAACTACATCCT   |
| TBP         | TGAGTTGCTCATACCGTGCTGCTA   | CCCTCAAACCAACTTGTCAACAGC   |
| VIM         | GAAGGCGAGGAGAGCAGGATT      | CAAGGTCATCGTGATGCTGAG      |
| ZEB1        | CATATTGAGCTGTTGCCGCTG      | TCTTGCCCTTCCTTTTCTGTGT     |
| BNC1        | TGGGTTGCCATAACCTGTCTATCT   | TACTTTGCATTTGTGGAGCTGCCG   |
| UPK1B       | AGTGACTCTGGATTTGGTGCTGGA   | AAGTCCGTACCATCTGACTTGGCA   |
| ANXA8       | ACACGAATCCATCCCAACCGAGAT   | AACACAGTGTCTTGGGTCAGGAA    |
| GPM6A       | TCCCTATGCCTCTCTGATTGCCA    | ACATCCAGTGTGTCTCCAGCAGTT   |
| CNN1        | AAGGACGCACTGAGCAACGCTATT   | ACGCCACTGTCACATCCACATAGT   |
| TAGLN       | ATGGCCAACAAGGGTCCTTCTAT    | ATCAGGGCCACACTGCACTATGAT   |
| MYH11       | AGAAGCCAGGGAGAAGGAAACCAA   | TGGAGCTGACCAGGTCTTCCATT    |
| ATCA2       | CACTGTCAGGAATCCTGTGA       | CAAAGCCGGCCTTACAGA         |
| POSTN       | CCCGTGACTGTCTATAAGCCAA     | GTGTGTCTCCCTGAAGCAGT       |
| cTnT        | TTCACCAAAGATCTGCTCCTCGCT   | TTATTACTGGTGTGGAGTGGGTGTGG |
| FSP1        | GTCAGAACTAAAGGAGCTGC       | TGTTGCTGTCCAAGTTGCTC       |
| FSTL1       | TCTGTGCCAATGTGTTTTGTGG     | TGAGGTAGGTCTTGCCATTACTG    |

TBP, TATA binding protein.
